# Supplementary material for: Correlation between leukocyte phenotypes and prognosis of amyotrophic lateral sclerosis
Source: eLife. 2022 Mar 15;11:e74065. doi: 10.7554/eLife.74065 (PMC8923665; doi:10.7554/eLife.74065)
Supplement: Figure 1—source data 1. [file elife-74065-fig1-data1.xlsx]

## Sheet: Sheet1
code	sex	diag_age	month	year	leukocyte	neutrophil	lymphocyte	monocyte
108	female	48	10.5667	0.867922	6.3	3.8	1.7	0.6
109	female	41	1.46667	0.120469	10.6	7.1
109	female	41	31.1667	2.55996	26.8	22.5	1.7	1.6
113	female	37	93.2667	7.66072	5.7	3.4	2	0.3
115	female	43	-0.966667	-0.0793998	11.2	7.9	2.4	0.7
115	female	43	31.7	2.60377	9.6	6.5	2.5	0.5
67	female	35	185.867	15.2667	3.9	2.2	1.3	0.3
118	female	48	38.7667	3.18421		13.8	1
119	female	70	0.266667	0.0219034	12.3	9	2.3	0.6
120	female	70	-1.63333	-0.134158	7.6	4.1	2.3	0.9
120	female	70	0.466667	0.038331	7.5	4.4	2.2	0.7
120	female	70	4.33333	0.35593	6.3	3.6	1.9	0.6
120	female	70	10.9667	0.900778	5.3	3.2	1.4	0.5
120	female	70	17.1333	1.40729	7.3	5.1	1.3	0.8
120	female	70	22.0333	1.80977	4.6	2.6	1.4	0.5
120	female	70	25.4333	2.08904	7.1	4.3	1.6	0.9
121	female	72	-2.43333	-0.199869	13.9	7	6	0.5
121	female	72	-0.633333	-0.0520206	11.9	6.9	4.1	0.6
121	female	72	-0.1	-0.00821378	12.1	5.3	5.7	0.8
123	female	72	-2.4	-0.197131	6.8	4.1	2.2	0.3
123	female	72	19.0667	1.56609	7.3	6.2	1	0.1
125	female	71	-0.933333	-0.0766619	7.1	4.2	2	0.7
125	female	71	11.6333	0.955536	6.3	2.7	2.7	0.7
125	female	71	19.7667	1.62359	7.4	4.7	1.8	0.8
127	male	57	27.9	2.29164	18.1	16.4	0.4	1.2
127	male	57	46.4	3.81119	8.2	5.3	1.7	1
127	male	57	59.6333	4.89815	31.4	26.9	1.6	2.4
127	male	57	59.9333	4.92279	13.5	8.1	3.4	0.7
127	male	57	60	4.92827	12.5	8.4	2.9	0.6
127	male	57	60.1333	4.93922	9	5.2	2.9	0.7
127	male	57	60.2	4.94469	7.2	4.1	2.1	0.6
127	male	57	60.4667	4.9666	7.4	3.1	3.4	0.6
127	male	57	68.4	5.61822	22.2	19.7	1.1	1.2
127	male	57	68.4333	5.62096	15.6	13.6	0.8	1
127	male	57	71	5.83178	5.5	2.7	2.2	0.5
130	female	43	3.66667	0.301172	5.4	3.3	1.6	0.4
130	female	43	176.467	14.4946	5.5	2.9	1.9
130	female	43	218.867	17.9772	9.3	6.1
130	female	43	253	20.7809	9.8	5.9
133	female	36	148.833	12.2248	4.4	2.2	1.9	0.2
133	female	36	152.8	12.5507	5.2	2.7	2.1	0.26
133	female	36	339.7	27.9022	5.3	2.1	2.6	0.3
135	male	49	1.4	0.114993	8.1	5.8
135	male	49	38.8333	3.18968	6.5	4.7	1.1	0.5
135	male	49	45.2	3.71263	4.3	3.2	0.7	0.3
136	male	65	96.1333	7.89618	5.8	3.9	1.5	0.3
30	female	33	40.5333	3.32932	4.4	2.2	1.6	0.4
30	female	33	49.9333	4.10141	5.5	3.1	1.6	0.5
30	female	33	57.9667	4.76125	5.7	3.9	1.4	0.2
30	female	33	88.4	7.26098	8.4	5.1	2.2	0.7
30	female	33	96.7667	7.9482	7.8	5	1.9	0.6
40	male	69	49.6333	4.07677	6	3.5	1.8	0.5
40	male	69	74.5667	6.12474	15	13.4	0.7	0.8
40	male	69	74.6667	6.13295	11.4	8.6	1.7	0.8
40	male	69	74.7333	6.13843	7	4.8	1.1	0.7
40	male	69	74.7667	6.14117	7.8	5.3	1.3	0.8
40	male	69	77.7	6.3821	14.7	12.4	1.2	1
40	male	69	93.7667	7.70179	8.2	5.9	1.2	0.8
40	male	69	93.9	7.71274	7	4.8	1.4	0.4
40	male	69	98.4333	8.08509	15.9	12.6	1.9	1.3
40	male	69	98.4667	8.08783	10.8	9	0.8	0.8
40	male	69	99.8333	8.20009	8.7	6	1.7	0.8
40	male	69	107.967	8.86814	17.5	15.5	1.1	0.8
40	male	69	108	8.87088	11.1	9.4	0.9	0.6
40	male	69	108.033	8.87362	7	5	1.1	0.7
137	male	62	28.9333	2.37652	13.8	10.3	2	1.2
139	male	46	24.8667	2.04249	6.4	3.9	1.9	0.5
139	male	46	29.5667	2.42854	6.9	4.2	2.1	0.5
140	female	61	5.8	0.476399	9.1	5.8	2.4	0.7
141	female	58	0	0	5.8	3.1	2.1	0.3
141	female	58	13.7	1.12529	9.6	7.6
141	female	58	48	3.94261	28.5	26.6	1	0.6
54	female	58	71.1667	5.84547	8.4	3.8	3.6	0.8
54	female	58	72.1	5.92213	13.5	8.8	3.2	1.1
143	female	78	-2.73333	-0.22451	5	2.3	2.1	0.4
143	female	78	-2.63333	-0.216296	5	2.6	2	0.3
145	female	46	78.8667	6.47793	8.4	5.2
145	female	46	86.5667	7.11039	7.8	5.3
145	female	46	91.2333	7.4937	5	2.5	1.8	0.4
145	female	46	92.1667	7.57036	7.45	4.25	2.35	0.65
145	female	46	95.1667	7.81678	7.4	4.3
145	female	46	96.5333	7.92903	6.6	3.7
145	female	46	98.9333	8.12616	7.8	4.5
146	female	44	43.1667	3.54561	3.9	2.3	1	0.5
146	female	44	75.8667	6.23152	10.9	9.1	0.8	0.8
147	male	74	14.1	1.15814	12.7	11.6
147	male	74	73.9333	6.07272	19.8	17.3	1	1.6
149	female	41	0.933333	0.0766619	6.2	3.3	2.2	0.5
150	male	62	2.13333	0.175227	11	5.8
150	male	62	103.267	8.48209	10.7	6.2	3	0.8
150	male	62	106.767	8.76958	17.3	14.5	1.9	0.7
153	male	63	13.5333	1.1116	6.6	4.5	1.3	0.5
156	male	43	39.3	3.22801	15	13.4	0.7	0.8
157	female	64	46.1	3.78655	9.1	6.6
158	male	23	27.3333	2.2451	12.1	9.8
158	male	23	29.4	2.41485	10.3	7.8	1.2	1
158	male	23	30.5667	2.51068	26.1	23.2	0.8	2.1
158	male	23	41.3	3.39229	52.5	48.9	1.8	1.8
158	male	23	41.5	3.40872	8.1	5.3	1.5	1
159	male	71	26.1667	2.14927	4.9	3.2	1.1	0.4
159	male	71	29.1667	2.39569	5.1	3.2	1.2	0.5
159	male	71	32.2667	2.65031	5.1	3.5	1.1	0.4
159	male	71	38.3	3.14588	5.2	3.6	0.9	0.5
159	male	71	41.5333	3.41146	4.4	2.7	0.9	0.5
159	male	71	46.4333	3.81393	4.3	2.5	1	0.6
159	male	71	50.8667	4.17807	5.6	4.1	0.7	0.5
159	male	71	54.3667	4.46556	5	3.4	0.8	0.6
159	male	71	62.7667	5.15551	5.5	3.8	0.7	0.6
159	male	71	69.3667	5.69762	6.2	4.8	0.5	0.4
159	male	71	73.0333	5.9988	6.7	4.9	0.6	0.9
159	male	71	74.5333	6.122	9.1	7	0.7	1.1
161	female	83	5.6	0.459972	12.4	11.9	0.6	0.9
162	male	49	16.5667	1.36075	15.8	13.4	1.1	1.2
165	male	67	0.2	0.0164276	10.3	7.3	1.8	0.8
165	male	67	20.5667	1.6893	7.9	5.5	1.6	0.4
168	female	67	-0.266667	-0.0219034	7.7	5.6	1.5	0.5
169	male	66	0	0	7	4.8	1.2	0.8
169	male	66	24.3333	1.99869	17.9	14.6	1.4	1.5
169	male	66	24.3667	2.00142	17.1	13.8	1.2	1.5
170	male	62	20.9667	1.72216	19.4	15.9
171	male	52	17.2667	1.41825	5.8	3.7
172	male	53	22.5667	1.85358	10.2	7	2.2	0.8
172	male	53	36.6	3.00624	13.3	11.9	0.6	0.7
174	female	70	-1.93333	-0.1588	3.3	1.9	1.1	0.2
175	female	63	1.83333	0.150586	40	0.4	1.8	0.2
176	male	56	91.2667	7.49644	5.3	4.2	0.4	0.3
176	male	56	118.1	9.70047	5.8	4.2	1.1	0.3
176	male	56	131.4	10.7929	3.1	1.9	1	0.2
177	female	60	60.3667	4.95838	8.8	6.9
178	male	65	0.833333	0.0684481	5.2	3	1.5	0.5
179	male	71	-2.9	-0.2382	4.1	2.7	0.9	0.4
179	male	71	-2.8	-0.229986	4.5	3	1	0.4
179	male	71	28.4667	2.33819	8.2	6.7	0.8	0.6
179	male	71	41.3	3.39229	4.5	3.9	0.3	0.3
179	male	71	85.0667	6.98719	4.7	2.8	1.4	0.4
181	male	40	80.7667	6.63399	17.7	15.7	0.9	1
181	male	40	82.7	6.79279	9.4	6.3	1.8	0.9
183	male	55	-1.6	-0.13142	4.6	2.5	1.4	0.6
183	male	55	3.9	0.320337	4.9	3	1.3	0.6
183	male	55	5.53333	0.454496	5.9	3.6	1.5	0.7
183	male	55	6.46667	0.531158	4.1	1.9	1.6	0.5
183	male	55	7.13333	0.585916	3.55	1.65	1.25	0.5
183	male	55	8.33333	0.684481	3.4	1.5	1.3	0.4
183	male	55	9.26667	0.761143	3.6	1.6	1.4	0.5
183	male	55	11.6	0.952798	4.6	2.1	1.7	0.6
183	male	55	12.2667	1.00756	5.8	3.5	1.5	0.6
183	male	55	13.9667	1.14719	3.9	1.8	1.5	0.5
183	male	55	17.4667	1.43467	5.1	3	1.2	0.7
183	male	55	18.4333	1.51407	5.7	3	1.4	0.9
183	male	55	19.1333	1.57157	7.5	4.1	1.9	0.9
183	male	55	19.3667	1.59073	5.9	3.3	1.4	0.7
183	male	55	19.9667	1.64002	4.7	2.3	1.6	0.6
183	male	55	23.1333	1.90012	6	3.6	1.5	0.7
183	male	55	27.0333	2.22046	3.5	1.7	1.2	0.5
183	male	55	33.0333	2.71328	4.2	1.9	1.5	0.7
183	male	55	40.0667	3.29099	4.8	2.6	1.5	0.5
183	male	55	41.5333	3.41146	4.9	2.6	1.5	0.6
183	male	55	48.6667	3.99737	18	15.6	0.9	1.4
183	male	55	51.4667	4.22736	9	7.2	0.8	1
185	female	39	151.467	12.4411	21.3	19.4	0.9	0.9
185	female	39	158.3	13.0024	7.5	5.5	1.4	0.5
187	female	75	13.2	1.08422	7.2	5.4
188	male	50	19.3667	1.59073	3.8	2.4	1.2	0.2
188	male	50	102.6	8.42734	7.2	3.5	3	0.4
190	male	58	45.5333	3.74001	7.1	5.4	0.9	0.5
57	female	22	50.5	4.14796	4.7	2.9	1.4	0.3
195	male	86	6.33333	0.520206	12.2	10.5	0.9	0.7
196	female	70	2.86667	0.235462	8.9	6.3
69	female	71	0	0	7.3	4.2	2.2	0.7
69	female	71	35.9333	2.95148	6.2	3.5	1.5	1.1
69	female	71	59.0333	4.84887	7.6	4.8	1.4	1
198	female	48	51.6667	4.24378	9.2	6.1	2.1	0.7
198	female	48	71.7667	5.89475	5.2	3.1	1.4	0.4
199	male	55	181.933	14.9436	6.2	4.3	1.4	0.5
204	male	50	27.7667	2.28069	17.2	15.4	0.9	0.8
205	female	43	117.7	9.66762	3.7	1.7	1.6	0.2
205	female	43	122.633	10.0728	5	2.4	2	0.5
14	female	41	6.13333	0.503778	6	3	2.2	0.6
14	female	41	7.73333	0.635199	3.9	1.6	1.7	0.5
14	female	41	13.3333	1.09517	4.8	2.6	1.4	0.5
14	female	41	19.1667	1.57431	5.9	4	1.3	0.5
14	female	41	57.8333	4.7503	5.8	3.2	1.8	0.6
207	female	55	0	0	7.3	5.4	1.5	0.3
211	male	69	43.7	3.58942	18.8	15.4	1.7	1
211	male	69	56.8	4.66543	10.7	7	1.8	1.4
213	female	72	44.1333	3.62501	8.9	5.9	2.2	0.6
214	male	50	9.76667	0.802212	5.2	3.4	1.3	0.4
214	male	50	10.1333	0.832329	4.6	3.2	1	0.3
214	male	50	20.4	1.67561	4.6	3.7	0.6	0.4
216	female	39	6.03333	0.495565	7.2	4.4	2.3	0.5
216	female	39	7.13333	0.585916	6.2	3.8	1.8	0.6
217	male	71	31.5667	2.59282	5.8	3.9	1.1	0.5
221	male	70	40.9667	3.36491	19	16.8	0.6	1.3
221	male	70	42.6	3.49907	18.8	17.4	0.3	0.9
223	male	44	151.133	12.4138	13.6	10.2	2.2	1
44	male	38	1.33333	0.109517	5.3	3.7	1	0.3
224	female	62	2.26667	0.186179	6.4	4.7	1.3	0.3
226	female	72	0	0	8.5	6	1.7	0.8
227	male	65	0	0	4.5	1.9	1.9	0.5
232	female	68	2.03333	0.167013	5.6	3.4
233	female	78	1.4	0.114993	5.7	3	1.4	0.4
233	female	78	4.7	0.386048	4.7	2.9	0.8	0.7
234	male	41	8.4	0.689957	5.8	3.4	1.6	0.6
234	male	41	9.53333	0.783047	6	3.1	2	0.6
234	male	41	10.1667	0.835067	5.9	3.8	1.5	0.4
234	male	41	11.1	0.911729	5.2	2.9	1.4	0.5
234	male	41	16.2667	1.33611	3.9	1.8	1.5	0.4
235	male	71	-0.2	-0.0164276	6.4	4.4	1.4	0.5
236	female	80	0.266667	0.0219034	11.2	6.7	2.7	1
238	male	73	-0.666667	-0.0547585	7.9	6	1.1	0.7
240	male	71	-0.433333	-0.035593	9.8	7	1.9	0.8
241	male	58	-0.633333	-0.0520206	6.7	5.1	1	0.5
241	male	58	9.63333	0.791261	11.6	9.5	0.8	0.7
242	male	74	-1.36667	-0.112255	4.7	2.8	1.2	0.5
244	male	77	0.9	0.073924	7.8	5.4	1.5	0.6
244	male	77	9.03333	0.741978	11	7	2.3	0.7
244	male	77	12.2667	1.00756	7.9	5.6	1.7	0.4
245	male	75	-0.266667	-0.0219034	8.4	7.3	0.4	0.6
249	female	71	0.0333333	0.00273793	4.2	1.8	1.6	0.6
250	female	63	0.3	0.0246413	4.5	2.4	1.5	0.6
251	male	63	-0.766667	-0.0629723	5.8	3.6	1.6	0.4
251	male	63	-0.566667	-0.0465447	5.8	2.7	2.3	0.4
251	male	63	12.3667	1.01577	6.9	4.2	2	0.4
350	female	65	3.8	0.312124	5.1	3.3	1	0.5
252	female	70	-1.66667	-0.136896	7.5	4.9	1.9	0.5
253	female	67	-2.06667	-0.169751	6.6	3.2	2.7	0.6
254	female	82	-1.66667	-0.136896	17.1	14.7	1.3	0.8
254	female	82	-1.2	-0.0985653	16	13	1.4	1.1
254	female	82	-0.966667	-0.0793998	18.2	16.6	1	0.2
254	female	82	3.4	0.279268	13.1	10.9	0.9	1
255	female	62	-2.6	-0.213558	8.4	3.5	3.8	0.7
256	female	73	19.0667	1.56609	16.4	11.7	1.9	2.4
256	female	73	19.1333	1.57157	12.9	11.3	0.7	0.8
257	female	80	7.9	0.648888	5.6	4.4	0.7	0.4
257	female	80	20.2667	1.66466	6.7	4.7	1	0.7
257	female	80	33	2.71055	16.8	13.1	1.6	1.2
258	male	71	-0.2	-0.0164276	6.1	4.2	1.4	0.4
259	male	55	-0.266667	-0.0219034	4.2	1.8	1.9	0.4
29	female	54	-0.0333333	-0.00273793	4.8	2.8	1.4	0.4
29	female	54	43.8667	3.60311	4.9	2.5	1.5	0.4
260	male	58	0	0	5.2	3.7	1	0.4
260	male	58	6.73333	0.553061	6.6	3.7	1.6	0.7
260	male	58	13.3667	1.09791	7.9	4.1	2	1.1
260	male	58	13.4	1.10065	4.4	2.2
260	male	58	13.4333	1.10338	4.8	2.1
86	female	54	40.9333	3.36217	7.2	4.3	2.2	0.6
265	female	76	0	0	7.4	3.8	2.8	0.6
266	male	66	22.4667	1.84536	4.3	2.4	1.2	0.4
271	male	76	0	0	7.5	5.5	1.3	0.6
51	male	52	46.6333	3.83036	5.8	3.3	1.5	0.6
272	female	70	14.8333	1.21838	4.2	1.9	1.6	0.5
273	female	80	-0.0666667	-0.00547585	5.8	3.8	1.4	0.6
274	female	57	-0.7	-0.0574964	6.4	2.9	2.7	0.5
274	female	57	5.53333	0.454496	5.5	3.2	1.7	0.4
71	male	65	52.4	4.30402	9.4	8.7	0.3	0.3
275	female	78	-0.666667	-0.0547585	5.5	3	1.6	0.8
276	female	67	-0.933333	-0.0766619	7	4.9	1.6	0.4
277	male	61	-0.766667	-0.0629723	7.1	4.8	1.5	0.6
279	male	66	-2.26667	-0.186179	9	5.1	2.8	0.7
279	male	66	32.3667	2.65853	9.1	5.7	2.2	0.8
279	male	66	35.4	2.90768	8.7	5.8	1.6	1
279	male	66	37.3667	3.06921	9.5	6.6	1.6	1.1
279	male	66	41.5667	3.41419	12.4	8.8	1.9	1.1
280	female	67	15.4	1.26492	8.5	6.6
281	male	68	0	0	7.3	4.1	2.3	0.7
282	male	71	0	0	5.2	3.8	0.8	0.5
283	female	66	-0.166667	-0.0136896	9.4	6.3	2	0.8
284	female	74	-1.36667	-0.112255	5.8	2.8	1.7	0.8
286	male	60	1.83333	0.150586	4.2	3.3	0.5	0.4
287	female	64	-0.333333	-0.0273793	5	3.2	1.4	0.3
288	male	57	0	0	6.4	3.3	2.4	0.4
289	male	70	19.6333	1.61264	10.6	7.95
289	male	70	19.7333	1.62085	6.5	4	1.6	0.7
289	male	70	25.3	2.07809	8.4	3.6	3.7	0.4
290	female	71	9.1	0.747454	4.9	2.9	1.5	0.4
3	male	66	0	0	9.3	6.9	1.7	0.6
3	male	66	17.7667	1.45931	8.9	5.3	1.8	0.7
3	male	66	38.8667	3.19242	17.3	14.6	1.3	0.9
74	male	47	3.3	0.271055	8.6	4.2	3.5	0.6
292	male	50	3.26667	0.268317	6.6	4.1	1.9	0.5
294	female	68	1.4	0.114993	8.2	4.6
68	male	62	0.933333	0.0766619	6.3	3.5	2.2	0.5
297	male	70	12.4	1.01851	10.8	7.6
297	male	70	12.4333	1.02125	11.4	8.1
297	male	70	12.4667	1.02398	11.8	8.5
49	female	44	-0.133333	-0.0109517	7.4	4.4	2.4	0.5
298	male	37	14.5667	1.19647	11.3	8.6	1.9	0.7
298	male	37	29	2.382	11.7	8.8	2.1	0.5
299	male	50	26.1333	2.14653	11.2	10.3	0.3	0.4
299	male	50	32.3	2.65305	1.9	1.2	0.4	0.3
299	male	50	32.3333	2.65579	3.1	1.8	0.7	0.5
300	female	72	9.83333	0.807688	10.6	7.3
301	male	65	1.03333	0.0848757	8.2	4.3	3	0.5
303	male	66	1.1	0.0903515	21.3	17.1	2.4	1.5
304	male	53	-1.33333	-0.109517	10.9	8.7	1.3	0.7
304	male	53	1.03333	0.0848757	7.8	5.4	1.6	0.6
78	female	69	21.2667	1.7468	8.5	5.3	2.2	0.6
307	male	64	-0.266667	-0.0219034	6.4	4.8	1	0.4
307	male	64	-0.166667	-0.0136896	5.6	4	0.9	0.4
308	female	68	27.0333	2.22046	3.6	1.6
308	female	68	28.6	2.34914	4.2	2.4
309	female	79	-2.03333	-0.167013	5.7	3.6	1.5	0.4
309	female	79	38.9333	3.1979	6.3	4.6	1.1	0.4
309	female	79	42.6333	3.50181	7	4.9	1.5	0.4
311	male	71	33.9333	2.78721	8.8	6	2.1	0.6
312	male	69	-0.966667	-0.0793998	5.9	3.8	1.6	0.4
312	male	69	-0.2	-0.0164276	6.3	4.4	1.4	0.4
312	male	69	5.46667	0.44902	19	16.2	1.1	1.1
313	male	84	0	0	6.7	4.8	1.2	0.6
314	female	75	-1.03333	-0.0848757	5.7	4	1.2	0.4
317	male	72	-1.86667	-0.153324	5.4	3.2	1.6	0.5
48	female	56	-0.5	-0.0410689	5.1	3.2	1.2	0.4
48	female	56	28.2667	2.32176	7.2	5	1.5	0.5
318	male	50	-0.133333	-0.0109517	6.2	5	0.8	0.4
319	male	70	-0.933333	-0.0766619	5.6	3.7	1.1	0.6
323	male	68	-2	-0.164276	6.3	4.1	1.6	0.4
324	male	91	0	0	11.6	9.2	1.4	0.8
325	male	48	-0.2	-0.0164276	5.3	3.9	1	0.3
325	male	48	15.6667	1.28683	3.7	2.2	0.8	0.4
326	male	64	-1.6	-0.13142	8.9	5.8	1.9	0.6
326	male	64	34.7	2.85018	8.9	5.9	2.2	0.6
327	male	47	114.533	9.40751	3.4	1.5	1.6	0.3
327	male	47	140.533	11.5431	4.8	2	2	0.6
327	male	47	148.933	12.2331	4.5	2.3	1.4	0.6
328	male	48	-1.86667	-0.153324	4.8	2.4	1.9	0.4
328	male	48	26.1	2.1438	3.2	1.4	1.5	0.2
330	female	74	-0.766667	-0.0629723	8.8	6.8	1.6	0.4
330	female	74	0.133333	0.0109517	10.2	7.4
331	male	51	12	0.985653	8.3	6.65	1	0.55
21	female	66	-0.9	-0.073924	5.6	4.6	0.6	0.2
21	female	66	0.266667	0.0219034	10.2	8.6	1.1	0.4
332	female	69	-0.633333	-0.0520206	8.6	6.4	1.6	0.6
333	male	73	-1.4	-0.114993	6.8	4.7	1.3	0.5
334	male	78	-0.733333	-0.0602344	6.7	4	1.9	0.6
335	female	81	0.233333	0.0191655	5.7	3.9	1.1	0.3
337	female	59	1.6	0.13142	7.6	5.5	1.6	0.4
339	female	81	0	0	13	9.1	2.7	0.9
340	female	62	-1.73333	-0.142372	4.4	2.9	1	0.3
340	female	62	23.0667	1.89464	5.8	4.2	1.2	0.3
341	male	61	-0.7	-0.0574964	14.8	12	1.8	0.8
16	male	57	-1.26667	-0.104041	9	5.7	2.3	0.8
16	male	57	11.9667	0.982915	5.2	3.5	0.8	0.6
16	male	57	12.0333	0.988391	4.8	2.4	1.5	0.5
16	male	57	12.3667	1.01577	9.5	6.8	1.8	0.6
16	male	57	23	1.88917	7.8	5.1	1.8	0.7
16	male	57	26.8667	2.20677	10.8	8.1	1.6	0.8
16	male	57	30.8667	2.53532	10.4	7.3	2.2	0.6
62	male	45	-1.06667	-0.0876136	7.1	5.3	1.3	0.3
62	male	45	25	2.05344	5.9	3.8	1.6	0.4
13	female	60	27.0667	2.2232	5.1	2.8	1.4	0.5
345	male	79	-1.53333	-0.125945	6	3.2	2.1	0.4
346	female	78	-0.566667	-0.0465447	4.4	2.9	1	0.4
346	female	78	21.4667	1.76322	6.5	4.9	1	0.5
346	female	78	25.7	2.11094	6.2	3.7	1.7	0.5
347	male	70	-1.16667	-0.0958274	6.2	3.8	1.4	0.7
347	male	70	23.1	1.89738	8.6	6.5	1	0.9
347	male	70	28	2.29986	6.4	4.6	1	0.6
347	male	70	30.9	2.53806	8.3	6	1.3	0.8
36	male	78	-1.4	-0.114993	6.9	5.7	0.6	0.5
46	male	70	0	0	4.3	2.4	1.4	0.4
348	female	69	9.66667	0.793998	9.9	8.1	1.2	0.6
27	female	54	21.0667	1.73037	5	3	1.2	0.6
27	female	54	27.1333	2.22867	6.6	4.3	1.3	0.9
349	female	74	-0.733333	-0.0602344	7	4.2	2	0.7
349	female	74	2.5	0.205344	14.6	11.1	1.7	1.7
349	female	74	2.56667	0.21082	11.9	8.5	2	1.2
349	female	74	2.76667	0.227248	8.2	4.8	2	1
349	female	74	3.03333	0.249151	12.3	9.4	1.5	1.2
351	female	63	0	0	6.5	4.5	1.4	0.5
352	male	56	-0.966667	-0.0793998	3.6	1.9	1.3	0.3
353	male	67	-0.133333	-0.0109517	4.2	2.2	1	0.6
353	male	67	18.2667	1.50038	4.8	2.7	1.2	0.6
19	male	64	0	0	7.6	5.3	1.3	0.7
19	male	64	19.3	1.58526	7.2	3.8	2.3	0.6
19	male	64	26.7667	2.19855	6.3	3.3	2.1	0.5
10	female	60	-0.433333	-0.035593	6.7	4.2	1.8	0.4
10	female	60	26.2333	2.15475	6.1	4	1.4	0.4
25	male	40	0	0	7.8	5	1.6	0.9
25	male	40	25.3667	2.08356	13.3	9.6	2	1.4
56	female	63	0	0	11	7.8	2.3	0.7
354	male	59	-0.866667	-0.0711861	5.4	3.3	1.6	0.4
354	male	59	19.4333	1.59621	4.6	2.6	1.2	0.6
355	female	63	5.46667	0.44902	7.8	5.2	1.6	0.7
84	female	54	-1.36667	-0.112255	4.6	2.4	1.4	0.4
83	male	67	-0.266667	-0.0219034	8.4	5.5	1.7	0.8
52	male	24	0.4	0.0328551	4.6	2.4	1.7	0.4
52	male	24	18.2333	1.49765	7.2	4.6	1.9	0.5
358	male	64	-0.0666667	-0.00547585	7.1	3.3	2.9	0.6
359	male	63	-0.533333	-0.0438068	7.8	5.1	1.9	0.6
359	male	63	10.2	0.837805	14.1	12.8	0.4	0.6
359	male	63	11.0667	0.908991	17.3	14.9	1.3	0.9
361	male	58	16.2333	1.33337	7.1	4.8	1.4	0.5
361	male	58	24.0333	1.97404	10.4	7.9	1.4	0.7
361	male	58	24.4	2.00416	9.4	7.2	1.4	0.6
362	male	70	-0.2	-0.0164276	8.4	6	1.7	0.6
363	male	77	-0.233333	-0.0191655	5	2.5	1.7	0.6
364	male	64	-0.7	-0.0574964	7.9	4.5	2.3	0.7
365	male	71	-0.266667	-0.0219034	7.3	5.5	0.9	0.5
365	male	71	13.3	1.09243	5.7	3.7	1.3	0.5
365	male	71	16.7333	1.37444	8.1	5.7	1.5	0.6
365	male	71	20.5	1.68382	6.6	4.3	1.5	0.5
365	male	71	23.7333	1.9494	8	5.8	1.4	0.6
24	male	65	-1.7	-0.139634	6	3.2	1.9	0.5
24	male	65	-0.0666667	-0.00547585	6.4	3.9	1.7	0.6
366	female	70	-0.266667	-0.0219034	9.2	7.8	1.2	0.1
366	female	70	3.43333	0.282006	9.1	4.9	3.3	0.8
367	female	71	-0.6	-0.0492827	8.9	6.1	1.8	0.7
368	male	65	0	0	6.2	3.3	2.2	0.5
368	male	65	9.53333	0.783047	6.1	3.2	2.2	0.5
368	male	65	16.0333	1.31694	7.1	4.1	2.2	0.6
368	male	65	19.1667	1.57431	7.1	3.5	2.6	0.8
368	male	65	22.3667	1.83715	7.3	4.2	1.8	0.8
63	male	45	0	0	4.3	2.8	0.9	0.3
63	male	45	13.7667	1.13076	6.5	4.7	1.1	0.6
63	male	45	15.0667	1.23754	6.2	4.6	1	0.5
370	male	69	1.6	0.13142	3.1	1.7	0.9	0.4
1	male	69	-1.03333	-0.0848757	8	5.2	2	0.6
73	female	77	-0.433333	-0.035593	5.1	3.6	1	0.4
371	male	82	11.7	0.961012	9.5	6.1	1.7	1.2
371	male	82	15.9	1.30599	9.2	5.7	1.8	1.2
371	male	82	19.3667	1.59073	8.5	6	1.4	0.9
372	female	76	-1.83333	-0.150586	7.3	5.4	1.1	0.4
372	female	76	18.1667	1.49217	9.5	7.8	0.9	0.5
75	male	59	0.266667	0.0219034	13.2	9.8	1.9	1
75	male	59	1	0.0821378	11.5	8.1	1.7	1
373	female	61	-0.433333	-0.035593	11.2	7	3	0.7
64	female	55	0.5	0.0410689	9	6.4	1.7	0.6
64	female	55	17.0333	1.39908	7.2	4.6	1.9	0.6
374	female	64	1.9	0.156062	8.3	5.8	1.6	0.6
374	female	64	10.5667	0.867922	7	4.9	1.3	0.7
374	female	64	16.2	1.33063	2.2	1.4	0.6	0.2
374	female	64	18.9	1.5524	20.5	16.3	2.3	1.2
374	female	64	19.5	1.60169	2.8	1.5	0.9	0.3
374	female	64	19.6	1.6099	2.1	0.8	1	0.3
374	female	64	19.6333	1.61264	5	3.6	0.8	0.5
374	female	64	19.8	1.62633	4.4	2.7	1.1	0.4
374	female	64	20.0333	1.64549	4.1	2.8	0.9	0.3
375	male	74	-0.4	-0.0328551	9.5	7	1.3	1.2
375	male	74	0.7	0.0574964	19.5	18	0.5	0.8
8	female	53	17.8667	1.46753	5	2.2	2.2	0.4
8	female	53	22.1333	1.81798	5.1	2.4	2.2	0.4
53	male	62	1.1	0.0903515	6	3.6	1	0.8
53	male	62	4.1	0.336765	4.4	2.2	1	0.7
53	male	62	15.2	1.24849	4.1	2.2	1.1	0.5
53	male	62	17.4	1.4292	6.8	2.7	2.1	0.7
11	male	73	-0.933333	-0.0766619	4.6	1.9	1.8	0.5
11	male	73	-0.4	-0.0328551	5.4	3	1.7	0.4
11	male	73	0.933333	0.0766619	6.5	3.6	1.9	0.7
42	male	74	-1.96667	-0.161538	6.6	4.7	1.3	0.4
42	male	74	3.03333	0.249151	4.5	2.7	1.2	0.4
377	male	81	-0.166667	-0.0136896	3.8	2.6	0.8	0.2
35	female	45	0	0	5.1	3.8	0.9	0.3
35	female	45	11.2667	0.925419	6.2	4.1	1.6	0.3
35	female	45	18.4	1.51134	4.8	3.3	1.2	0.3
379	male	88	-0.133333	-0.0109517	7.2	4.8	1.2	0.8
379	male	88	-0.0666667	-0.00547585	5.4	3.4	0.9	0.9
380	male	65	4.3	0.353192	7.5	4.8	1.8	0.6
39	female	85	9.4	0.772095	7.1	5.2	0.9	0.9
45	male	64	0.133333	0.0109517	6.7	4.4	1.6	0.4
45	male	64	12.7333	1.04589	6.7	4	1.8	0.6
381	female	63	14.5	1.191	5	3.2	1.1	0.4
381	female	63	17.7	1.45384	5.3	3.4	1.4	0.4
382	male	71	-2.36667	-0.194393	8	5	1.7	1.2
79	male	53	-0.1	-0.00821378	3.5	2.2	0.9	0.3
79	male	53	2.6	0.213558	10.4	8.2	1.3	0.8
58	male	47	-0.1	-0.00821378	5.3	3.5	1.3	0.5
9	male	64	0	0	4.8	2.8	1.5	0.4
383	male	28	8.53333	0.700909	6.5	4.2	1.6	0.5
2	female	74	2.06667	0.169751	7.6	5.7	1	0.7
2	female	74	15.8667	1.30325	6.2	4	1.3	0.6
47	male	57	22.8	1.87274	6.4	4.2	1.3	0.7
385	female	71	-0.166667	-0.0136896	6.8	4.4	1.5	0.5
385	female	71	13.5333	1.1116	8.3	6.4	1.2	0.5
386	female	60	2.3	0.188917	4.2	3	0.6	0.4
386	female	60	2.36667	0.194393	3.9	1.9	1	0.7
386	female	60	2.63333	0.216296	4.1	2.2	0.8	0.7
20	female	72	14.3667	1.18005	9.1	6.9	1.3	0.6
387	female	69	0	0	8.2	4.8	2.8	0.5
387	female	69	6.63333	0.544847	9.3	5.9	2.8	0.6
387	female	69	11.9667	0.982915	20.6	17.2	2	1.2
388	female	71	-1.16667	-0.0958274	6.8	4.7	1.6	0.3
388	female	71	14.1333	1.16088	9.5	7.5	1.4	0.4
31	female	72	-0.0333333	-0.00273793	8.8	6.6	1.5	0.6
31	female	72	2.56667	0.21082	7.2	4.8	1.8	0.4
32	male	74	-0.0666667	-0.00547585	7.3	5.1	1.3	0.6
32	male	74	7.06667	0.58044	6.6	4.7	1.2	0.5
390	female	59	-0.6	-0.0492827	6.9	3.4	2.6	0.7
80	female	83	-0.0333333	-0.00273793	7	4.8	1.7	0.4
22	female	57	-0.0333333	-0.00273793	5.1	3.6	1.1	0.3
65	female	52	0	0	5.1	2.8	1.7	0.2
82	female	72	0.766667	0.0629723	7.4	4.9	1.8	0.6
394	male	63	3.63333	0.298434	8.4	5.2	2.4	0.5
43	male	68	-0.4	-0.0328551	6.9	4.7	1.4	0.6
43	male	68	0.8	0.0657102	8.6	6.1	1.4	1
43	male	68	3.96667	0.325813	6.5	3.8	1.8	0.6
43	male	68	8.46667	0.695433	8.1	5.8	1.7	0.4
43	male	68	11.6	0.952798	6	4.1	1.4	0.4
395	male	66	-0.466667	-0.038331	7	3.8	2.2	0.7
395	male	66	5.3	0.43533	5.2	2.2	2.2	0.6
395	male	66	9.7	0.796736	20.6	18.8	0.3	1.3
395	male	66	9.73333	0.799474	20	18.2	1	0.7
395	male	66	9.76667	0.802212	13.2	11.1	1.2	0.9
395	male	66	9.83333	0.807688	5.1	3.9	0.8	0.3
396	female	67	-1.43333	-0.117731	4.1	2.7	0.9	0.3
396	female	67	3.9	0.320337	3.9	2.6	0.8	0.3
397	female	70	-0.166667	-0.0136896	4.8	2.3	1.9	0.4
398	male	63	-2.53333	-0.208082	6	4.4	1	0.4
398	male	63	14.1333	1.16088	7	5.4	1	0.3
399	female	56	-2.23333	-0.183441	5.4	2.8	2	0.4
399	female	56	-1.63333	-0.134158	4.7	2.4	1.8	0.4
399	female	56	1.43333	0.117731	6.6	3.8	2.2	0.4
399	female	56	5.4	0.443544	5.4	3	1.8	0.4
399	female	56	9.13333	0.750192	6.4	3.3	2.5	0.5
4	female	76	-2.9	-0.2382	5.8	4	1.1	0.5
4	female	76	0	0	6.1	4.4	1.1	0.5
4	female	76	0.7	0.0574964	7.9	6.2	1.1	0.5
400	male	65	-2.8	-0.229986	5.2	2.6	2	0.4
400	male	65	-0.266667	-0.0219034	4.7	2.6	1.6	0.4
401	male	76	-0.466667	-0.038331	6.7	4.8	1.2	0.5
401	male	76	1.13333	0.0930895	7.4	5.4	1.2	0.6
401	male	76	4.93333	0.405213	10.2	8	0.9	1
401	male	76	7.36667	0.605082	10	7.8	1.1	0.9
402	male	63	-1.03333	-0.0848757	7.4	5.6	1.1	0.6
402	male	63	7.5	0.616033	7.5	5.3	1.1	0.8
15	female	54	0.733333	0.0602344	5.5	2.6	2.1	0.6
15	female	54	1.86667	0.153324	4.7	1.8	1.7	0.4
15	female	54	2.1	0.172489	4	1.8	1.7	0.4
15	female	54	3.06667	0.251889	4.4	2.1	1.8	0.4
15	female	54	3.1	0.254627	4.6	2.4	1.8	0.4
15	female	54	3.13333	0.257365	4.4	1.9	2	0.3
15	female	54	3.16667	0.260103	5.4	3.4	1.6	0.4
15	female	54	3.2	0.262841	6.1	3.8	1.8	0.4
15	female	54	3.26667	0.268317	3.2	1.6	1.2	0.3
15	female	54	7.63333	0.626985	5.1	2.9	1.7	0.4
70	male	63	0	0	6.3	3.5	2	0.6
70	male	63	4.86667	0.399737	6.5	4	1.7	0.5
33	female	78	-1.3	-0.106779	5.6	3.4	1.5	0.5
33	female	78	0	0	7.2	5.9	0.9	0.4
33	female	78	6.86667	0.564013	8.4	5	2.5	0.7
33	female	78	7.83333	0.643413	4.4	2.6	1.1	0.4
34	male	76	-1.73333	-0.142372	5.5	3.5	1.2	0.6
403	female	78	-0.166667	-0.0136896	12	7.8	2.7	1
5	female	58	-2.06667	-0.169751	5.7	3.8	1.3	0.5
5	female	58	0.9	0.073924	6.7	4.2	1.7	0.6
38	male	56	0	0	9	6.2	1.8	0.9
38	male	56	0.433333	0.035593	8.8	5.7	2	0.9
404	female	73	1.46667	0.120469	5.2	3.3	1	0.6
404	female	73	4.66667	0.38331	7.7	6	1	0.6
404	female	73	7.63333	0.626985	6.4	4.6	1.2	0.5
66	female	70	-1.8	-0.147848	7.5	5.1	1.8	0.5
66	female	70	-0.7	-0.0574964	6.4	3.5	2.2	0.6
66	female	70	5.9	0.484613	5.3	3	1.9	0.4
405	male	60	0.9	0.073924	6.8	4.7	1.6	0.4
405	male	60	3.06667	0.251889	12.1	9.6	1.4	0.9
85	female	72	0	0	7.4	4.9	1.8	0.6
87	female	56	-1.83333	-0.150586	7.7	4.8	2	0.6
87	female	56	0.7	0.0574964	7	4.3	2	0.4
87	female	56	1.83333	0.150586	5.4	3.3	1.5	0.4
87	female	56	4.4	0.361406	6.8	4.7	1.6	0.4
87	female	56	4.66667	0.38331	6.9	4.6	1.7	0.4
100	male	35	0.833333	0.0684481	4.8	2.7	1.6	0.4
100	male	35	1.56667	0.128683	4.5	2.6	1.4	0.4
89	female	67	0	0	7.8	6.5	0.9	0.3
408	male	88	0	0	7	4.3	1.6	0.6
92	male	71	0.466667	0.038331	4.9	2.7	1.6	0.5
92	male	71	2.76667	0.227248	5.1	2.9	1.7	0.4
409	male	59	4.26667	0.350454	5.2	3.3	1.2	0.6
410	female	66	-1.96667	-0.161538	4	2.4	1.3	0.3
98	male	64	-0.433333	-0.035593	6.8	5	1.2	0.5
94	female	68	0.1	0.00821378	7	4.8	1.3	0.8
411	male	82	0	0	5.5	3.9	1.2	0.3
91	female	62	-0.966667	-0.0793998	5.5	4.6	0.5	0.3
91	female	62	-0.266667	-0.0219034	5.2	4	0.8	0.4
91	female	62	0	0	6.2	5.4	0.4	0.4
91	female	62	2.06667	0.169751	4.9	3.8	0.6	0.4
95	male	59	-0.266667	-0.0219034	6.7	3.5	2.6	0.5
95	male	59	2.16667	0.177965	6.8	3.8	2.4	0.5
413	male	52	0	0	4.9	3.2	1.1	0.4
96	male	75	2.33333	0.191655	8.9	6.2	1.7	0.7
97	female	37	0	0	7.2	5.2	1.2	0.6
97	female	37	1.03333	0.0848757	7.4	5.2	1.3	0.7
415	female	55	-0.266667	-0.0219034	6.2	3.4	1.9	0.6
415	female	55	1.16667	0.0958274	6.9	4	1.9	0.8
416	female	75	1.16667	0.0958274	6.7	5.1	0.9	0.5
416	female	75	2.66667	0.219034	9.2	7.4	0.9	0.7
99	female	65	0.933333	0.0766619	5.9	4.1	1.2	0.5
417	male	74	0	0	4.5	2.6	1.1	0.4
417	male	74	0.966667	0.0793998	4.4	2.5	1.2	0.5
106	male	60	-1.13333	-0.0930895	8.5	4.3	3.6	0.5
106	male	60	0	0	9.5	5.8	2.9	0.6
106	male	60	0.733333	0.0602344	9.3	5.4	3.1	0.6
106	male	60	0.966667	0.0793998	8.6	4.7	3.1	0.6
419	male	65	-1.13333	-0.0930895	4.5	2.8	1.2	0.5
419	male	65	-0.233333	-0.0191655	3.2	1.6	1.2	0.3
419	male	65	0.833333	0.0684481	6.5	4.2	1.5	0.6
420	male	49	-0.133333	-0.0109517	5	3	1.5	0.3
420	male	49	0.933333	0.0766619	5.3	3.1	1.8	0.3
101	male	66	0.833333	0.0684481	6.6	4.6	1.1	0.6
101	male	66	1.3	0.106779	6.1	4.4	0.9	0.6
421	male	77	-1.43333	-0.117731	8	4.6	2.6	0.6
421	male	77	0	0	7.4	3.9	2.4	0.8
421	male	77	1	0.0821378	8.6	4.5	2.8	0.8
107	female	65	-2.23333	-0.183441	3.6	2.3	0.9	0.3
107	female	65	-0.366667	-0.0301172	4.2	3	0.8	0.4
107	female	65	0.633333	0.0520206	5.8	5.1	0.4	0.2
107	female	65	0.666667	0.0547585	4.2	3	0.8	0.3
424	male	56	-0.233333	-0.0191655	4.8	2.9	1.3	0.4
