# Supplementary material for: Correlation between leukocyte phenotypes and prognosis of amyotrophic lateral sclerosis
Source: eLife. 2022 Mar 15;11:e74065. doi: 10.7554/eLife.74065 (PMC8923665; doi:10.7554/eLife.74065)
Supplement: Figure 2—source data 1. [file elife-74065-fig2-data1.xlsx]

## Sheet: Sheet1
cell_type	HR (95%CI)
tcell_nr	0.97(0.65-1.45)
bcell_nr	0.90(0.36-2.23)
nkcell_nr	0.61(0.42-0.88)
cd4	0.73(0.52-1.03)
cd4_naiva	0.77(0.48-1.25)
cd4_em	1.30(0.86-1.97)
cd4_cm	0.97(0.57-1.64)
cd4_emra	1.39(1.01-1.92)
th1_cd4_em	1.17(0.72-1.87)
th2_cd4_em	0.68(0.43-1.08)
th17_cd4_em	1.06(0.71-1.60)
th1_cd4_cm	1.15(0.74-1.79)
th2_cd4_cm	0.64(0.48-0.85)
th17_cd4_cm	1.65(0.89-3.07)
cd8	1.38(1.03-1.85)
cd8_naiva	0.90(0.50-1.62)
cd8_em	0.85(0.56-1.28)
cd8_cm	0.86(0.56-1.32)
cd8_emra	1.25(0.86-1.80)
cd4_hla_cd38_n	1.13(0.75-1.71)
cd4_hla_cd38_p	0.98(0.67-1.44)
cd8_hla_cd38_n	0.79(0.51-1.21)
cd8_hla_cd38_p	0.84(0.54-1.30)
