# Supplementary material for: Correlation between leukocyte phenotypes and prognosis of amyotrophic lateral sclerosis
Source: eLife. 2022 Mar 15;11:e74065. doi: 10.7554/eLife.74065 (PMC8923665; doi:10.7554/eLife.74065)
Supplement: Supplementary file 5. [file elife-74065-supp5.docx]

**Supplementary Table 5** Sensitivity analyses of the associations of leukocyte populations with risk of death after a diagnosis of amyotrophic lateral sclerosis (ALS), focusing on newly diagnosed ALS patients, first cell measure only, or excluding patients with *C9orf72* expansions*

| Cell type | HR (95%CI)1 | HR (95%CI)2 | HR (95%CI)3 |
| --- | --- | --- | --- |
| Leukocyte (10^9/L) | 1.13 (0.90-1.42) | 1.14(0.91-1.44) | 1.19 (0.95-1.51) |
| Neutrophil (10^9/L) | 1.15 (0.93-1.41) | 1.11(0.89-1.39) | 1.17 (0.94-1.46) |
| Lymphocyte (10^9/L) | 0.90 (0.74-1.09) | 1.02(0.82-1.27) | 1.02 (0.81-1.29) |
| Monocyte (10^9/L) | 0.97 (0.79-1.19) | 1.10(0.90-1.35) | 1.09 (0.88-1.36) |
| *Cox model was applied to derive the hazard ratios (HRs) with 95% confidence intervals (CIs) of risk of death, per standard deviation increase of the cell markers, with adjustment for age at diagnosis, sex, site of onset, diagnostic delay, ALSFRS-R score, time difference between the measure of ALSFRS-R score and diagnosis, BMI, and time difference between the measure of BMI and diagnosis.  1Analysis restricted to newly diagnosed ALS patients.  2Analysis restricted to the first measurement of cell populations.  3Analysis restricted to patients without *C9orf72* mutation. | | | |
